# Supplementary material for: Quantifying the distribution of ceria nanoparticles in cucumber roots: the influence of labeling
Source: Royal Society of Chemistry journal article supplement (doi:10.1039/c4ra13915a), 2014-12-09
Supplement: c4ra13915a1.pdf [file c4ra13915a1.pdf]

1 Supporting information

2 **Quantifying the Distribution of Ceria Nanoparticles in**  
3 **Cucumber Plants: the Influence of Labeling**

4 Xin Gui,<sup>1</sup> Xiao He,<sup>2,†</sup> Yuhui Ma,<sup>2</sup> Peng Zhang,<sup>2</sup> Yuanyuan Li,<sup>2</sup> Yayun Ding,<sup>2</sup> Ke Yang,<sup>3</sup> Huafen Li,<sup>1</sup>

5 Yukui Rui,<sup>1,†</sup> Zhifang Chai,<sup>2</sup> Yuliang Zhao,<sup>2</sup> and Zhiyong Zhang<sup>2,†</sup>

6 1 College of Resources and Environmental Sciences, China Agricultural University,  
7 Beijing 100093, People's Republic of China;

8 2 Key Laboratory for Biomedical Effects of Nanomaterials and Nanosafety, Key  
9 Laboratory of Nuclear Radiation and Nuclear Energy Technology, Institute of High  
10 Energy Physics, Chinese Academy of Sciences, Beijing 100049, People's Republic of  
11 China;

12 3 Shanghai Synchrotron Radiation Facility, Shanghai Institute of Applied  
13 Physics, Chinese Academy of Sciences, Shanghai 201204, People's Republic of China.

14 †: Authors to whom correspondence should be addressed.

15 E-mail: hx421@ihep.ac.cn; zhangzhy@ihep.ac.cn; ruiyukui@163.com; TEL: 86-10-  
16 88233215; FAX: 86-10-88235294.

17

18

19 The supporting information includes:

20 1. Number of pages: 5

21 2. Number of figures: 4

22 **1. Preparation and Characterization of Nano-ceria**

23 In the present work, 0.5 M solution of hexamethyleneteramine (HMT) and 0.0375M  
24 solution of  $\text{Ce}(\text{NO}_3)_3 \cdot 6\text{H}_2\text{O}$  were mixed and stirred in 75°C water bath for 3 h. The  
25 particles obtained were washed three times by ultrapure water. The morphology and  
26 size distribution of the as-synthesized nano-ceria were characterized by TEM (FEI  
27 Co., Eindhoven, The Netherlands). The samples were dispersed in ultrapure water and  
28 sonicated for 15 min before dropped on a Cu grid for observation. X-ray diffraction  
29 (XRD) of nano-ceria was obtained on a Panalytical's X'Pert PRO diffractometer  
30 (Panalytical BV, the Netherlands) using monochromatized Cu  $K\alpha$  radiation at 30 kV  
31 and 40 mA. The XRD patterns were scanned from 5-90°  $2\theta$  range using 0.02° step  
32 intervals. The size distribution and the surface charge density (in terms of zeta  
33 potential) of as-synthesized nano-ceria (AS-ceria) and diiodofluorescein-coated nano-  
34 ceria (DIF-ceria) in ultrapure water were evaluated by dynamic light scattering (DLS)  
35 analysis (Zeta-Sizer, Malvern Instruments, UK). The hydrodynamic sizes of AS-ceria  
36 and DIF-ceria were  $34.2 \pm 9.7$  nm (PDI=0.218) and  $39.5 \pm 13.4$  nm (PDI=0.241),  
37 respectively; their zeta-potentials were  $36.6 \pm 5.9$  mV and  $34.3 \pm 7.0$  mV.

38

39 Figure S1. The XRD pattern of nano-ceria.

40 The specific surface area of nano-ceria was  $86.85 \text{ m}^2 \cdot \text{g}^{-1}$ , measured by the BET

41 method using a surface area analyzer (Autosorb-1 model, Quantachrome, USA).  
42 Assuming that each DIF molecule could cover 0.9 nm<sup>2</sup> of the particulate surface  
43 (fluorescein is a nonspherical solute with an approximate size of 0.47, 0.81, and 1.09  
44 nm in different directions)<sup>23</sup>, 25% of the surface of nano-ceria was covered with DIF  
45 when 25 mg nano-ceria were mixed with 50 mL 2×10<sup>-5</sup> M DIF solution.

## 46 2. Effect of DIF exposure on the root elongation of cucumber

47 The root elongation of cucumber was determined after a 5-day incubation in DIF  
48 solution at a concentration of 2×10<sup>-5</sup> M. In a parallel study, the seeds were pre-soaked  
49 in the respective DIF solution for 2 h before the 5-day germination test.

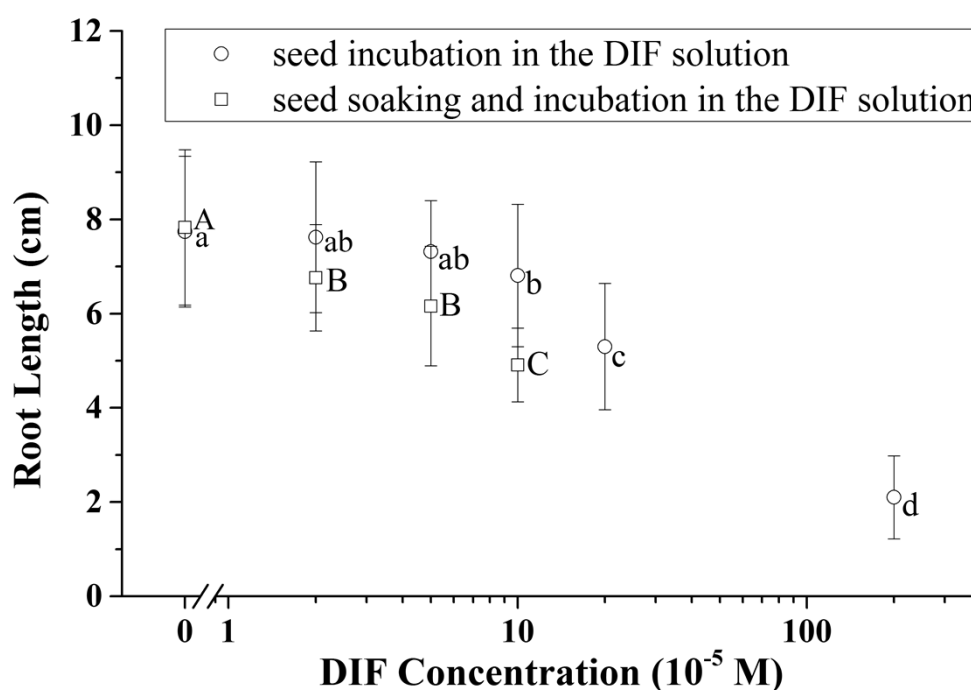

50

51 Figure S2. Cucumber root elongation after a 5-day incubation in DIF solution or a 2-hour pre-soaking followed by  
52 a 5-day incubation in DIF solution. The cucumber root length is expressed as mean±SD of 40 replicates. In the  
53 seed incubation treatment, data labeled with different lowercase letters are significantly different at  $p < 0.05$ ; in the  
54 seed soaking and incubation treatment, data labeled with different uppercase letters are significantly different at  $p$   
55  $< 0.05$ .

## 56 3. TEM images of the cross sections of cucumber roots treated with AS-ceria and

57 **DIF-ceria**

58 After a 5-day germination, cucumber roots were washed with deionized water  
59 thoroughly and the root apices were cut and fixed in 2.5% glutaraldehyde solution.  
60 Then they were dehydrated in a graded acetone series and embedded in Spurr's resin.  
61 Ultrathin sections (90 nm) were obtained using an UC6i ultramicrotome (Leica,  
62 Austria) with a diamond knife. The sections were collected on copper grids and  
63 observed on a JEM-1230 (JEOL, Japan) transmission electron microscope operating  
64 at 80 kV without staining.

65 As shown in figure S3, most of the AS-ceria and DIF-ceria agglomerates were found  
66 on the surface of roots though the seedlings had been thoroughly washed.

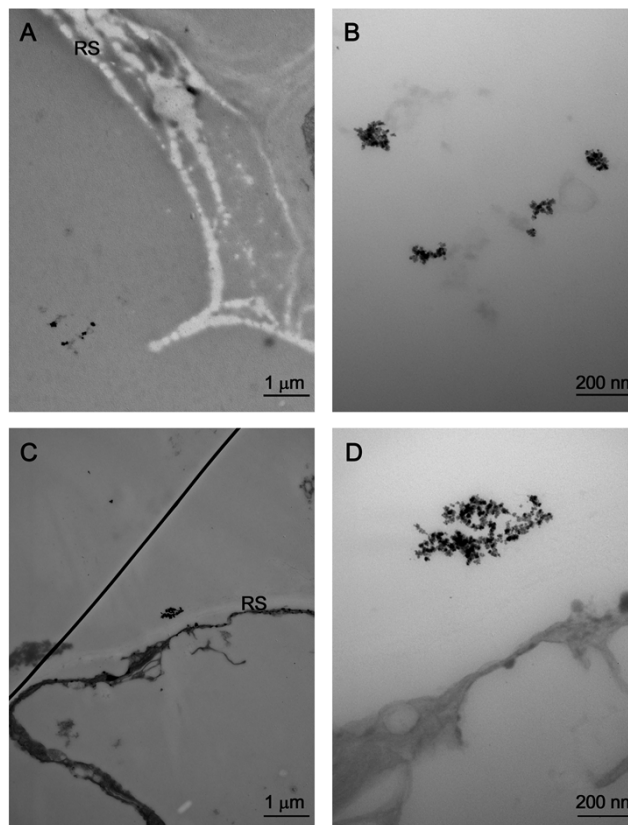

67

68 Figure S3. TEM images of the cross sections of cucumber roots treated with As-ceria (A&B) and

69 DIF-ceria (C&D). RS: root surface.

70 **4. The influence of DIF coverage**

71 Our results showed that fluorescent labeling could change the behaviors and bio-  
72 effects of nano-ceria when 25% of the particulate surface was coated with DIF. We  
73 further determined the labeling-caused changes by different DIF-coverage rates. The  
74 results suggest that to minimize the labeling-caused changes, the DIF coverage rate  
75 should not be larger than 5%.

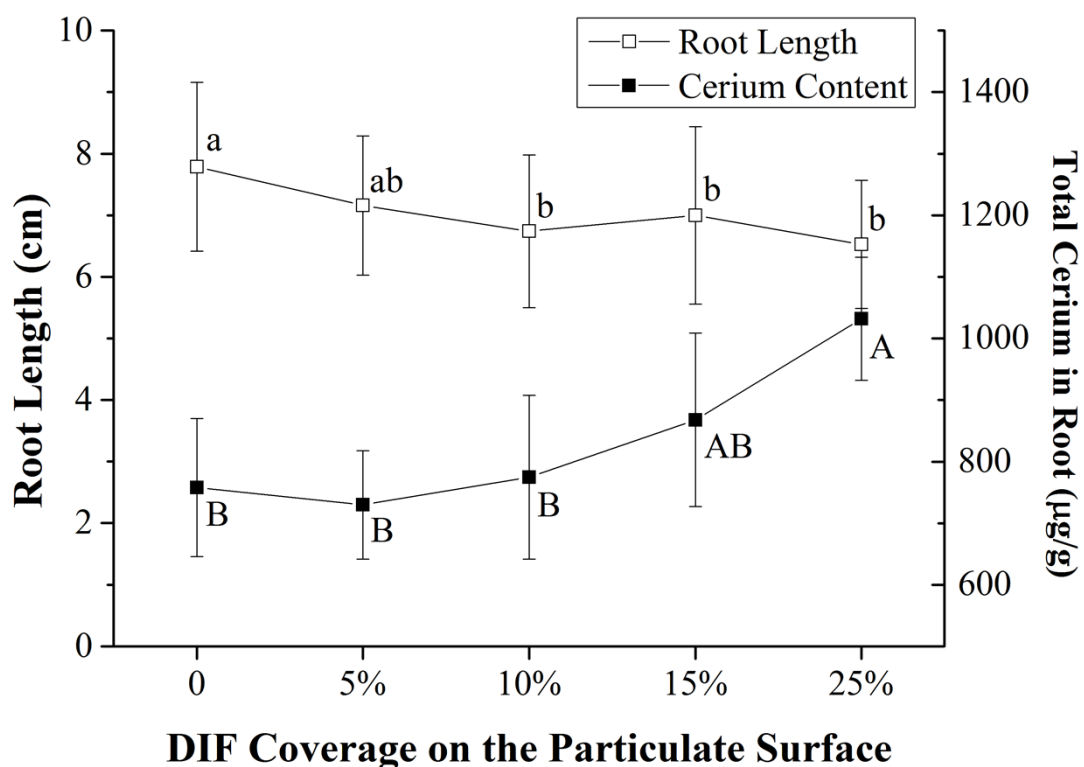

76

77 Figure 4. The changes in the root length and root cerium content caused by the different DIF coverage rates on the  
78 surface of nano-ceria. Cucumber root lengths labeled with different lowercase letters are significantly different at  $p$   
79  $< 0.05$ ; As for the contents of total cerium in roots, data labeled with different uppercase letters are significantly  
80 different at  $p < 0.05$ .
